# Supplementary material
Source: Springer Nature journal article supplement (https://www.springermedizin.de/resource/supplementary/12913_2007_455_MOESM3_ESM.pdf/9534784)

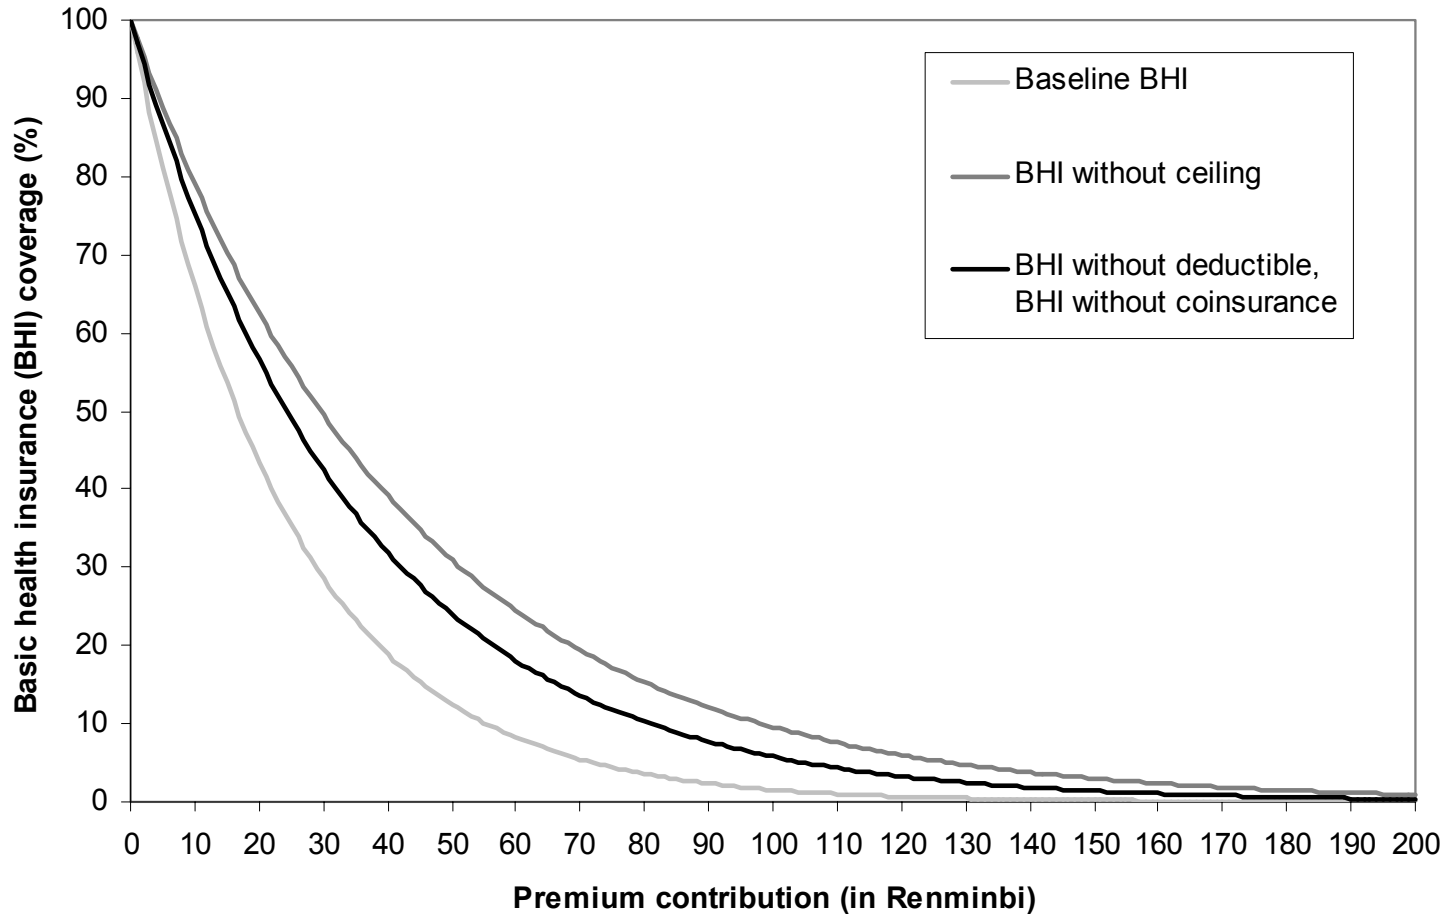

Supplement: MOESM3 [file 9534784]
